# Supplementary material for: Engineering poly(lactic-co-glycolic acid)/calcium carbonate microspheres with controllable topography and their cell response
Source: Royal Society of Chemistry journal article supplement (doi:10.1039/c3tb20284d), 2013-01-01
Supplement: c3tb20284d.pdf [file c3tb20284d.pdf]

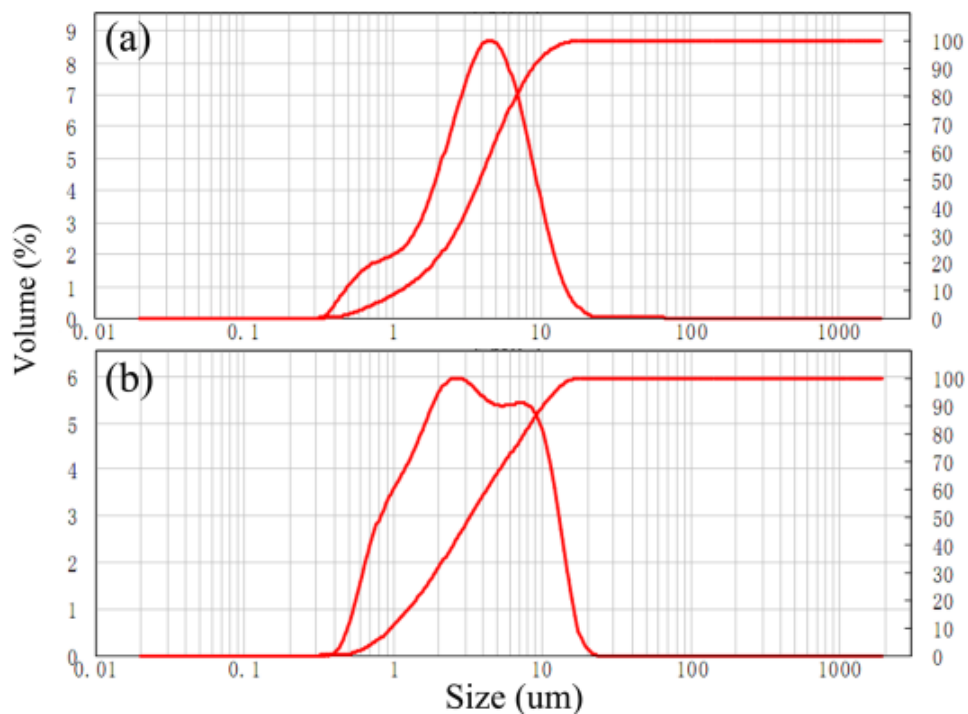

Fig. S1 The size distributions of calcium carbonate particles used in this paper. (a) CC-1; (b) CC-2.

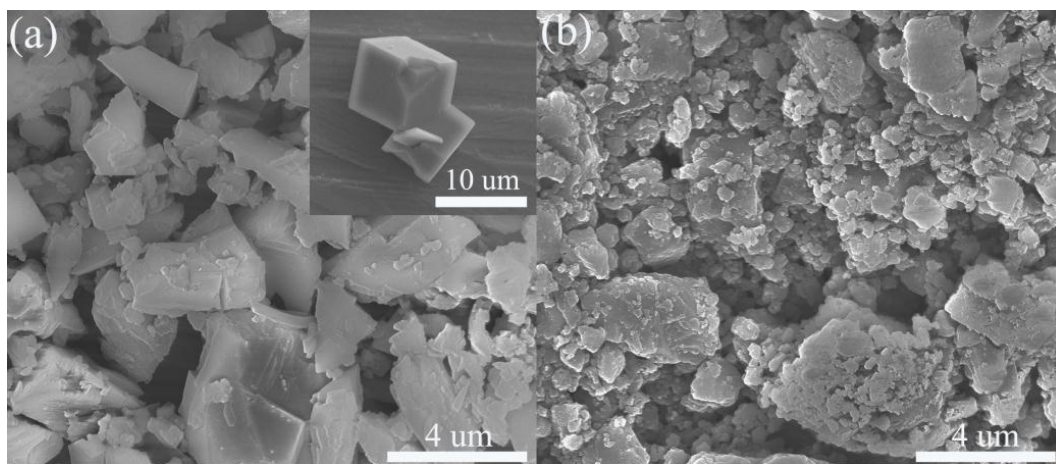

Fig. S2 The SEM images of CC-1 (a) and CC-2 (b) particles. The upper right image was the raw CC particle before grinding.
